# Supplementary material for: Childhood obesity prevention in general practice: supporting implementation through co-ideation
Source: PubMed Central journal article supplement (PMC10901475; doi:10.1093/fampra/cmad117), 2024-01-18
Supplement: cmad117_suppl_supplementary_material.pdf [file cmad117_suppl_supplementary_material.pdf]

**Supplementary table:****Summary of growth monitoring and promotion of healthy behaviours relevant to obesity prevention in childhood from the “Guidelines for preventive activities in general practice”<sup>1</sup>**

| <b>Age</b>                             | <b>Growth monitoring</b>                                                                                                                                                                                                     | <b>Promotion of healthy behaviours</b>                                                             |
|----------------------------------------|------------------------------------------------------------------------------------------------------------------------------------------------------------------------------------------------------------------------------|----------------------------------------------------------------------------------------------------|
| Neonatal                               | Physical examination per the Child Personal Health Record (or equivalent)                                                                                                                                                    |                                                                                                    |
| 2, 4, 6, 12 and 18 months; and 3 years | Physical exam per the Child Personal Health Record: <ul style="list-style-type: none"><li>• regular measurement, plotting on growth charts and interpretation</li><li>• include body mass index (BMI) from 2 years</li></ul> | Support breastfeeding<br>Promote healthy eating (second year of life), physical activity and sleep |
| 3.5–5 years                            | Physical exam (include BMI)                                                                                                                                                                                                  | Promote healthy eating, drinking, physical activity and healthy sleep                              |
| 6–13 years                             | Routinely measure growth and BMI                                                                                                                                                                                             | Promote healthy eating, drinking, physical exercise and sedentary behaviour reduction              |
| 14–19 years                            | Routinely measure growth and BMI                                                                                                                                                                                             | Promote healthy eating, drinking, sleep and physical activity                                      |

*Extracted from Table 3.1: Age-related health checks in children and young people in the “Guidelines for preventive activities in general practice”<sup>1</sup>*

**Reference:**

1. The Royal Australian College of General Practitioners. Guidelines for preventive activities in general practice. 9th ed, updated. East Melbourne, Vic, Australia: RACGP; 2018
